# Supplementary figures and images for: Highly transparent and flexible silica/cellulose films with a low coefficient of thermal expansion
Source: Royal Society of Chemistry journal article supplement (doi:10.1039/c4ra08026b), 2014-01-01

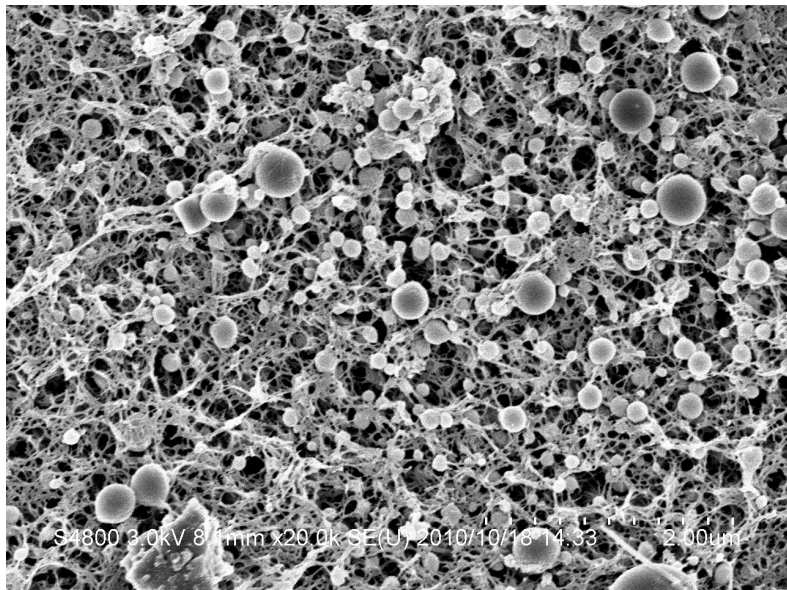

Supplement: c4ra08026b2.pdf [file c4ra08026b2.pdf]
